# Supplementary material for: Torrefaction Upgrading of Heterogenous Wastes Containing Cork and Chlorinated Polymers
Source: MDPI journal article supplement (doi:10.3390/environments9080099), 2022-08-06
Supplement: s1 [file s1]

## Article

# Torrefaction upgrading of cork and chlorine-containing plastic waste blends

Andrei Longo <sup>1</sup>, Catarina Nobre <sup>2</sup>, Ali Şen <sup>3</sup>, Roberta Panizio <sup>2</sup>, Paulo Brito <sup>2</sup> and Margarida Gonçalves <sup>1,2,\*</sup>

<sup>1</sup> Mechanical Engineering and Resource Sustainability Center, Department of Chemistry, Faculty of Sciences and Technology, NOVA University of Lisbon, Campus de Caparica, 2829-516 Caparica, Portugal

<sup>2</sup> VALORIZA—Research Centre for Endogenous Resource Valorization, Polytechnic Institute of Portalegre, Campus Politécnico 11, 7300-555 Portalegre, Portugal

<sup>3</sup> Forest Research Centre, School of Agriculture, University of Lisbon, Tapada da Ajuda, 1349-017 Lisboa, Portugal

\* Correspondence: mmpg@fct.unl.pt

## Supplementary Materials

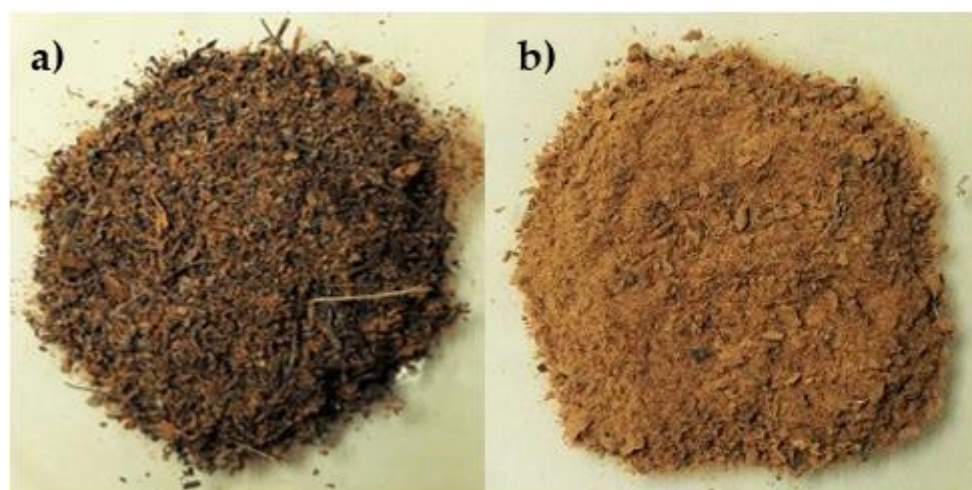

**Figure S1.** Refuse derived fuel composed of cork and polymer wastes used in the torrefaction tests: (a) CPW-1 and (b) CPW-2.

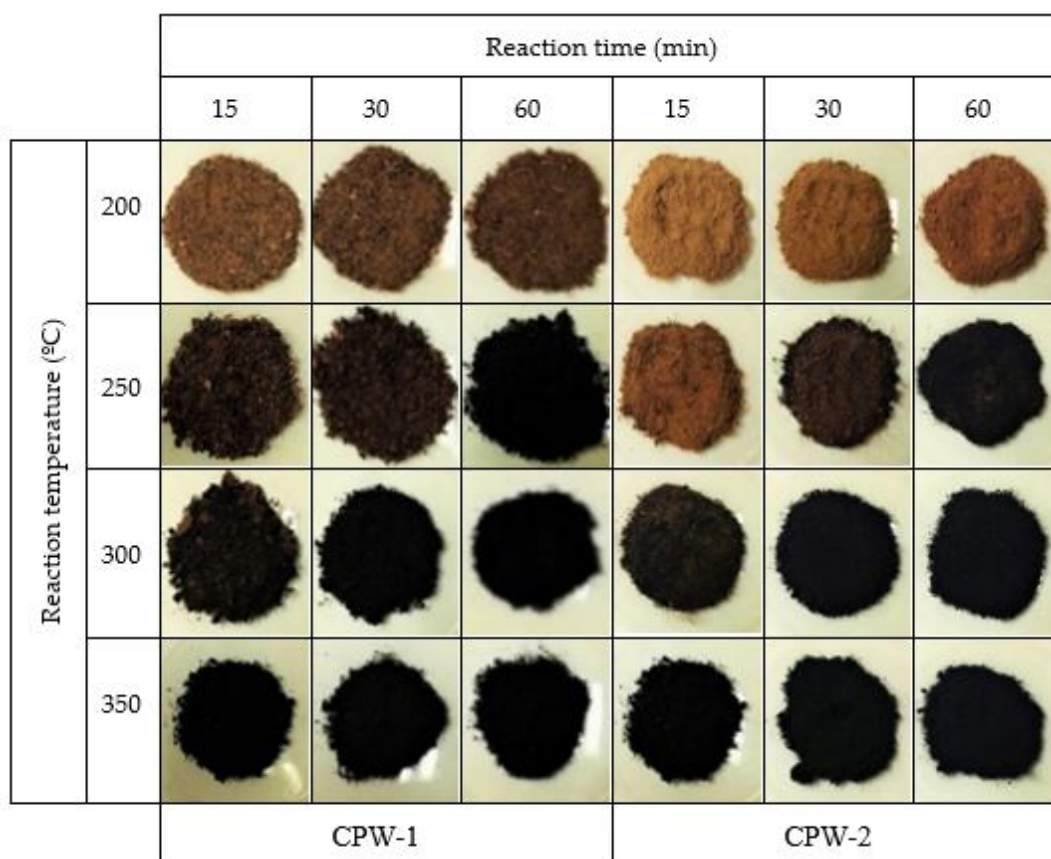

**Figure S2.** Appearance of the chars obtained at different temperatures and residence times from CPW-1 and CPW-2.

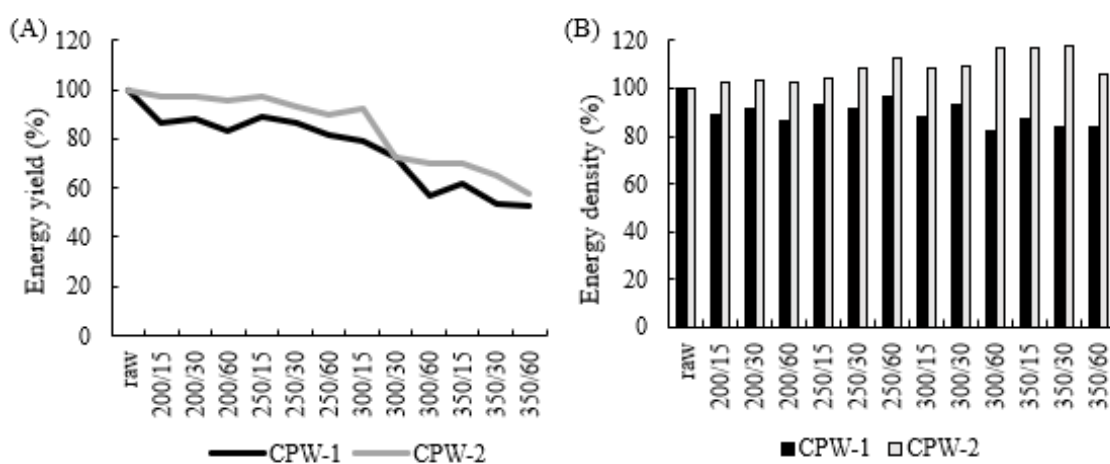

**Figure S3.** (A) Energy yield and (B) energy density of biochars compared to raw wastes.
